# Supplementary material for: Tungsten nitride nanocrystals on nitrogen-doped carbon black as efficient electrocatalysts for oxygen reduction reactions
Source: Royal Society of Chemistry journal article supplement (doi:10.1039/c4cc07137a), 2014-10-14
Supplement: c4cc07137a1.pdf [file c4cc07137a1.pdf]

## Electronic Supplementary Information

# Tungsten Nitride Nanocrystals on Nitrogen-Doped Carbon Black as an Efficient Electrocatalyst for Oxygen Reduction Reaction

*Youzhen Dong<sup>1,2</sup>, and Jinghong Li<sup>2\*</sup>*

1 Institute of materials science and technology

Nanjing University of Aeronautics and Astronautics, Nanjing 210000, China

2 Department of Chemistry, Key Laboratory of Bioorganic Phosphorus Chemistry and Chemical Biology, Tsinghua University, Beijing 100084, China

Fax: +86 10 6279 5290; Tel: +86 10 6279 5290; E-mail: jhli@mail.tsinghua.edu.cn

### 1. Chemicals

All chemicals were of analytical grade and used without further purification. Ammonium metatungstate ( $(\text{NH}_4)_6\text{H}_2\text{W}_{12}\text{O}_{40} \cdot n\text{H}_2\text{O}$ ) and Nafion solution (5 wt%) are purchased by Alfa Aesar. Ammonia gas ( $\text{NH}_3$ ) purity is 99.999%.

### 2. Synthesis of Tungsten Nitride Nanocrystals on Nitrogen-Doped Carbon Black (WN/N-Carbon black)

0.07 g ammonium metatungstate and 0.37 g carbon black were dispersed in 100 mL deionized water by ultrasonication. The obtained solution was heated at 70 °C for 2 h, and then steamed to dry at 100 °C. Finally, the powder was carbonized at 450 °C in air for 3 h and 700 °C in an  $\text{NH}_3$  atmosphere for 3 h.

### 3. Characterizations

XRD patterns were obtained via a D8 Advance (Bruker) X-ray diffractometer with

CuK  $\alpha$  radiation ( $\lambda=1.5418$ ). SEM images were obtained by means of a JSM 7401F, 3 KV. TEM images were obtained with a Hitachi model H-800 transmission electron microscope operating at an accelerating voltage of 100 kV. X-ray photoelectron spectroscopy (XPS) measurements were performed on a PHI Quantera Scanning X-ray Microprobe using a monochromic Al-K $\alpha$  ( $\lambda = 1486.7$  eV) (Binding energy is calibrated with C 1s - 284.8 eV).

#### **4. Electrochemical measurement**

All experiments were performed at room temperature. Before every measurement, the glassy carbon electrode (GCE) surface was polished using 50 nm Al<sub>2</sub>O<sub>3</sub> slurry and washed with ethanol and deionized water in ultrasonic bath. The electrochemical cell was assembled with a conventional three-electrode system: a glassy carbon working electrode, an Ag|AgCl/KCl (saturated) reference electrode, and a Pt wire counter electrode. The homogeneous ink was prepared by dispersing 1 mg catalyst 1 mL in Nafion solution (0.5 wt%, aq) with at least 30 min sonication. Then 6 and 20 mL of the catalyst inks were coated onto a clean GCE of 3 and 5 mm in diameter for CV and RDE measurements. Electrochemical measurements were performed using a CHI 830 electrochemical analyzer coupled with a RDE system (Princeton Applied Research, Model 616).

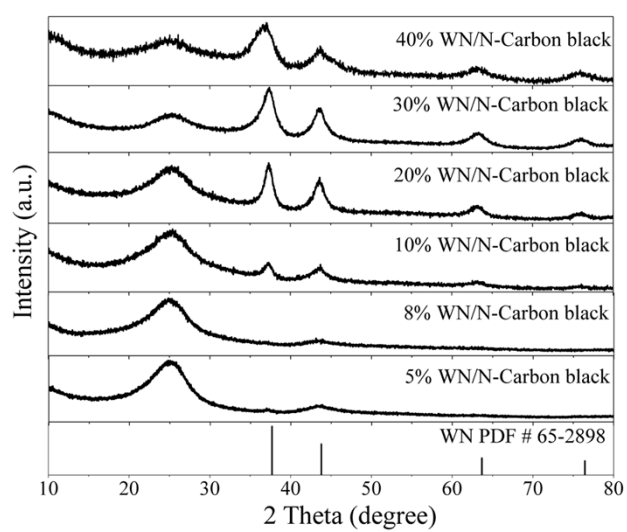

**Figure S1.** XRD patterns of WN/N-Carbon black with different contents of WN as indicated.

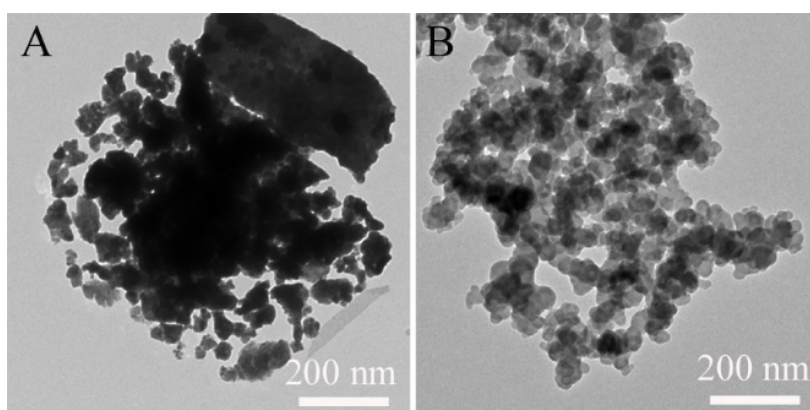

**Figure S2.** TEM images of pure WN and N-Carbon black.

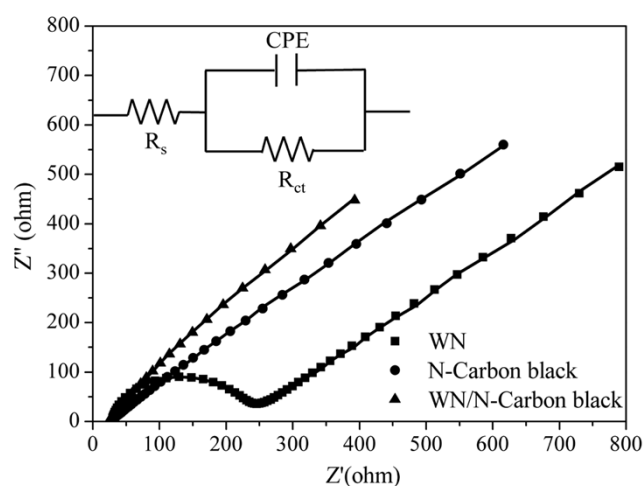

**Figure S3.** Electrochemical Impedance Spectra of WN, N-Carbon black and WN/N-Carbon black in 5 mM  $\text{Fe}(\text{CN})_6^{3-/4-}$  containing 0.5 M KCl from 0.1 Hz to 100 kHz with a signal amplitude of 10 mV. Inset is the equivalent circuit used to fit the impedance spectra. In the equivalent circuit,  $R_s$ ,  $R_{ct}$ , and CPE were the electrolyte resistance, the electron-transfer resistance, and the chemical capacitance.

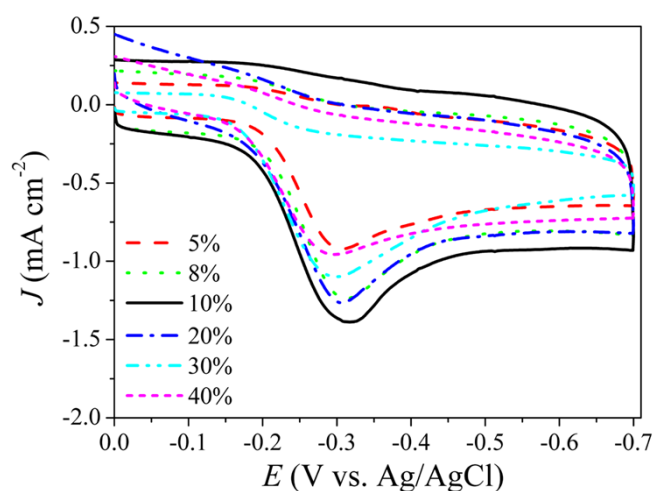

**Figure S4.** Cyclic voltammograms of WN/N-Carbon black with different contents of WN as indicated in  $\text{O}_2$ -saturated 0.1 M KOH solutions. Scan rate:  $50 \text{ mV s}^{-1}$ .

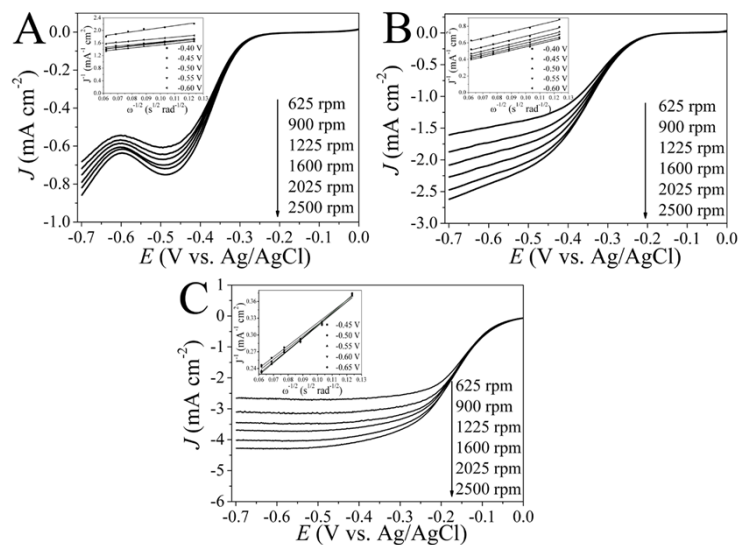

**Figure S5.** RDE voltammograms at different rotation rates of A) WN, B) N-Carbon and C) Pt/C in O<sub>2</sub>-saturated 0.1 M KOH solutions. Sweep rate: 5 mV s<sup>-1</sup>. Insets are the corresponding K-L plots at different potentials.

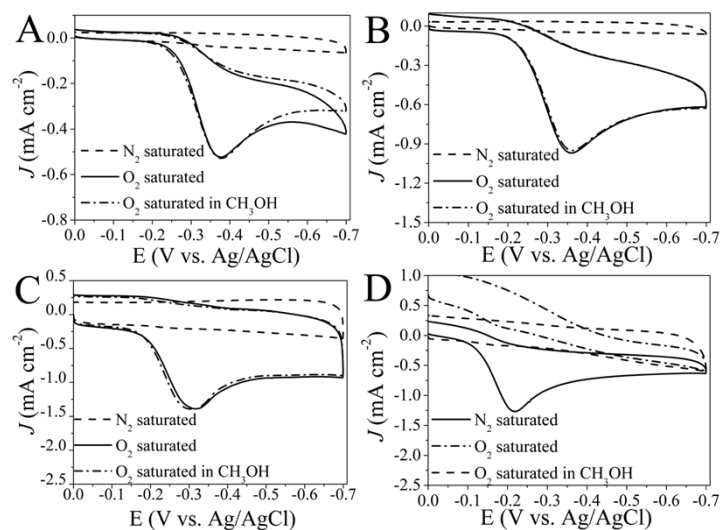

**Figure S6.** Cyclic voltammograms of A) WN, B) N-Carbon black, C) WN/N-Carbon black and D) Pt/C in N<sub>2</sub>- and O<sub>2</sub>-saturated 0.1 M KOH solutions as well as O<sub>2</sub>-saturated 0.1 M KOH solution with 3 M methanol. Scan rate: 50 mV s<sup>-1</sup>.
